# Supplementary material for: Unveiling microplastics pollution in Alaskan waters and snow
Source: Royal Society of Chemistry journal article supplement (doi:10.1039/d4ew00092g), 2024-01-01
Supplement: d4ew00092g1.pdf [file d4ew00092g1.pdf]

## Supplementary file

### Unveiling Microplastics Pollution in Alaskan Waters and Snow

Subhabrata Dev<sup>1,2\*</sup>, Davis Schwarz<sup>2,3</sup>, Muradur Rashedin<sup>2,3</sup>, Md Ibnul Hasan<sup>2,3</sup>, Darya Kholodova<sup>2,3</sup>, Shane Billings<sup>2</sup>, David L. Barnes<sup>2,4</sup>, Nicole Misarti<sup>2</sup>, Navid B. Saleh<sup>5</sup>, Srijan Aggarwal<sup>2,3\*</sup>

<sup>1</sup>Department of Civil Engineering, University of Alaska Anchorage, Anchorage, Alaska 99508, United States

<sup>2</sup>Water and Environmental Research Center, University of Alaska Fairbanks, Fairbanks, Alaska 99775, United States

<sup>3</sup>Department of Civil, Geological, and Environmental Engineering, University of Alaska Fairbanks, Fairbanks, Alaska, 99775, United States

<sup>4</sup>Department of Civil Engineering, Montana State University, Bozeman, Montana 59717, United States

<sup>5</sup>Fariborz Maseeh Department of Civil, Architectural and Environmental Engineering, University of Texas at Austin, Austin, Texas 78712, United States

*Submitted to Environmental Science: Water Research and Technology*

\*Corresponding Authors.

Subhabrata Dev, Water and Environmental Research Center, University of Alaska Fairbanks, Fairbanks, Alaska, 99775, USA, [sdev@alaska.edu](mailto:sdev@alaska.edu)

Srijan Aggarwal, Department of Civil, Geological, and Environmental Engineering, University of Alaska Fairbanks, Fairbanks, Alaska, 99775, USA, [saggarwal@alaska.edu](mailto:saggarwal@alaska.edu)

## 37 **Section S1. Microplastics quantification**

38 We transferred 100 mL of sample to a 250 mL conical flask and stained with Nile Red (19123,  
39 Sigma-Aldrich) using two different methods as shown in Fig. S3. Method 1 (adopted from  
40 previous studies<sup>39-41</sup>) follows the protocol where Nile red was added at the last step, whereas  
41 in Method 2 (adopted from previous studies<sup>42-44</sup>) Nile red was added at the first stage. We  
42 faced challenges using method 1 where direct addition of Nile red on glass fiber filter led to  
43 the the staining of filters resulting in background fluorescence noise and underestimation of  
44 microplastics count during microscopic observation. Therefore, we followed method 2, where  
45 Nile red was added at the first stage to avoid the direct contact of Nile red with the glass fiber  
46 filter. In method 2, we did not observe any bleaching effect of H<sub>2</sub>O<sub>2</sub> on the Nile red stained  
47 microplastics. The comparison of Nile red stained microplastics using these two methods has  
48 been shown in Fig. S4. The figure shows that the background fluorescence noise has been  
49 significantly reduced using method 2 and it provided clear visibility of the microplastic  
50 particles as compared to method 1. Previous studies adding Nile red before the oxidation steps  
51 reported minimum to no reduction of the fluorescent intensity of Nile red stained microplastics.  
52 Therefore, we followed method 2 for staining and quantifying microplastics in all the samples  
53 throughout this study.

54

## 55 **Section S2. PCA R Code**

56 We summarized our PCA object with the ‘summary’ function. A biplot was generated with the  
57 ‘ggbiplot’ function under the ‘ggbiplot’ package. Finally, the ‘PCAtest’ function within the  
58 PCAtest package was used to test the statistical significance of the PCA. The detailed R Studio  
59 codes for PCA analysis is provided below.

60 RStudio Code:

61

62 #Read file

63 PCAD= read.csv(file.choose(), header = TRUE)

64 head(PCAD)

65

66 #Omit n/a

67 PCA = na.omit(PCAD)

68 head(PCA)

69

70 #PCA

71 PCA.pca <- prcomp(PCA[,c(3:9)], center = TRUE,scale. = TRUE)

72 summary(PCA.pca)

73

74 #Biplot

```

75 install.packages("devtools")
76 library(devtools)
77 install_github("vqv/ggbiplot")
78 library(ggbiplot)
79
80 ggbiplot(PCA.pca, ellipse = TRUE, groups = PCA$Source, varname.size=7)+
81   geom_point(aes(color=PCA$Source), size= 5, shape=16)+
82     scale_fill_manual("Source Type")+
83 theme_classic()+
84   theme(legend.title = element_text(size = 16, face='bold', colour = "Black"),
85         legend.text = element_text(size = 16, face='bold', colour =
86 "Black"),
87         legend.box.just = "right",
88         legend.margin = margin(6, 6, 6, 6),
89         panel.border = element_rect(linetype = "solid", size = 1.5, fill =
90 NA))+
91   theme(plot.title=element_text(family="", face='bold', hjust=0.05, vjust=0.5,
92
93         colour='Black', size=16, margin=margin(t=40,b=-30)),
94         #axis.title.y = element_blank(),
95         axis.title = element_text(color="Black", size=18, face="bold"),
96         #axis.text.y=element_blank(),
97         axis.text=element_text(color="Black", size=16),
98         axis.ticks= element_line(size = 1.3),
99         axis.ticks.length = unit(-0.2, "cm"))
100
101 #PCAtest
102
103 devtools::install_github("arleyc/PCAtest")
104 library(PCAtest)
105 result <- PCAtest(PCA[,c(3:9)], 100, 100, 0.05, varcorr=FALSE, counter=FALSE,
106 plot=TRUE)
107
108

```

## Tables and Figures

109  
110  
111  
112  
113  
114  
115  
116

**Table S1:** Sample metadata showing detailed sample information, including source, coordinates, and MP count. Deionized water (with 18.2 MΩ-cm conductivity) was used as a control blank and stored, processed, and visualized for MPs following an identical protocol used for the field samples. The microplastics data presented in this table were blank subtracted and left censored values were substituted (<LOD with LOD/2 and <LOQ with LOQ/2)

| Ser no. | Sampling Date | Location Name                   | Sample Source | Latitude   | Longitude  | Region       | Microplastics Count (L <sup>-1</sup> ) | Size (µm) |
|---------|---------------|---------------------------------|---------------|------------|------------|--------------|----------------------------------------|-----------|
| 1       | July, 2020    | Lowe River                      | River         | 61.0669444 | -146.04983 | Southcentral | 259 <sup>a</sup>                       | 67.3      |
| 2       | July, 2020    | Blueberry Recreation Lake       | Lake          | 61.1211435 | -145.68814 | Southcentral | 259 <sup>a</sup>                       | 509.0     |
| 3       | July, 2020    | Blueberry Recreation Lake       | Lake          | 61.147999  | -145.72611 | Southcentral | 259 <sup>a</sup>                       | 71.9      |
| 4       | July, 2020    | Worthington Glacier River       | River         | 61.1678964 | -145.71523 | Southcentral | 634                                    | 32.5      |
| 5       | July, 2020    | Squirrel Creek                  | Creek         | 61.665815  | -145.16787 | Southcentral | 259 <sup>a</sup>                       | 64.8      |
| 6       | July, 2020    | Chitina Town Lake               | Lake          | 61.5147414 | -144.43775 | Southcentral | 86 <sup>b</sup>                        | 629.4     |
| 7       | July, 2020    | Lake near Chitina               | Lake          | 61.5656074 | -144.44466 | Southcentral | 571                                    | 47.0      |
| 8       | July, 2020    | Klutina River                   | River         | 61.9547204 | -145.32487 | Southcentral | 259 <sup>a</sup>                       | 56.0      |
| 9       | July, 2020    | Meiers Lake                     | Lake          | 62.8184931 | -145.49737 | Southcentral | 737                                    | 132.9     |
| 10      | July, 2020    | Summit Lake                     | Lake          | 63.1184385 | -145.49501 | Southcentral | 841                                    | 59.9      |
| 11      | July, 2020    | Castner Creek                   | Creek         | 63.4032702 | -145.7352  | Interior     | 86 <sup>b</sup>                        | 813.9     |
| 12      | March, 2021   | Haman St.                       | Snow          | 64.828918  | -147.91443 | Interior     | 821                                    | 69.4      |
| 13      | March, 2021   | Fox Den Road                    | Snow          | 64.958054  | -147.61833 | Interior     | 614                                    | 83.5      |
| 14      | March, 2021   | University of Alaska Fairbanks  | Snow          | 64.8575    | -147.82194 | Interior     | 1011                                   | NA        |
| 15      | March, 2021   | Tanana River                    | Snow          | 65.1605556 | -151.96028 | Interior     | 681                                    | NA        |
| 16      | March, 2021   | North Slope Haul Road 1         | Snow          | 67.811351  | -149.82265 | Interior     | 259 <sup>a</sup>                       | 62.0      |
| 17      | March, 2021   | North Slope Haul Road 2         | Snow          | 67.810548  | -149.82179 | Interior     | 681                                    | 96.7      |
| 18      | March, 2021   | Yukon-Koyukuk School District 1 | Snow          | 64.622432  | -149.55242 | Interior     | 701                                    | 61.6      |
| 19      | March, 2021   | Yukon-Koyukuk School District 2 | Snow          | 64.67733   | -149.81173 | Interior     | 259 <sup>a</sup>                       | 102.2     |
| 20      | March, 2021   | Yukon-Koyukuk School District 3 | Snow          | 64.916559  | -149.43073 | Interior     | 867                                    | 90.8      |

|    |             |                                                                  |       |            |            |              |                  |       |
|----|-------------|------------------------------------------------------------------|-------|------------|------------|--------------|------------------|-------|
| 21 | March, 2021 | Yukon-Koyukuk Census Area                                        | Snow  | 64.756909  | -149.13132 | Interior     | 1206             | NA    |
| 22 | March, 2021 | Adjacent to Alyeska Pipeline (APL) valve house                   | Snow  | 67.7986533 | -149.81979 | Interior     | 995              | 92.6  |
| 23 | March, 2021 | Adjacent to Dietrich River and Met Station (ADS1)                | Snow  | 67.6448217 | -149.73775 | Interior     | 848              | 103.6 |
| 24 | March, 2021 | Located between TAPS and Dalton highway                          | Snow  | 67.7359717 | -149.75863 | Interior     | 810              | 93.0  |
| 25 | March, 2021 | Upper Sag River valley 1                                         | Snow  | 68.44598   | -148.70284 | Far North    | 864              | 58.8  |
| 26 | March, 2021 | Upper Sag River valley 2                                         | Snow  | 68.4135083 | -148.95772 | Far North    | 814              | 56.6  |
| 27 | March, 2021 | Arctic National Wildlife Refuge Steep Ridge                      | Snow  | 68.4119267 | -148.13664 | Far North    | 781              | 57.0  |
| 28 | March, 2021 | Arctic National Wildlife Refuge Platue                           | Snow  | 68.64327   | -147.35129 | Far North    | 1031             | 95.2  |
| 29 | March, 2021 | East of Dalton Hoghway Remote Location 1                         | Snow  | 69.102205  | -146.82428 | Far North    | 681              | 95.9  |
| 30 | March, 2021 | North Slope Borough School District                              | Snow  | 69.229     | -147.6184  | Far North    | 1010             | 130.2 |
| 31 | March, 2021 | East of Dalton Hoghway Remote Location 2                         | Snow  | 68.9766883 | -147.23306 | Far North    | 661              | 95.4  |
| 32 | March, 2021 | East of Dalton Hoghway Remote Location 3                         | Snow  | 68.6820283 | -148.04123 | Far North    | 698              | 59.6  |
| 33 | March, 2021 | East of Dalton Hoghway Remote Location 4                         | Snow  | 68.617605  | -148.15362 | Far North    | 259 <sup>a</sup> | 119.7 |
| 34 | March, 2021 | East of Dalton Hoghway Remote Location 5                         | Snow  | 68.484505  | -147.83512 | Far North    | 895              | 125.0 |
| 35 | April, 2021 | Remote Location 1 at the West of Arctic National Wildlife Refuge | Snow  | 68.6932283 | -147.47897 | Far North    | 259 <sup>a</sup> | NA    |
| 36 | April, 2021 | Remote Location 2 at the West of Arctic National Wildlife Refuge | Snow  | 68.7719867 | -147.43274 | Far North    | 552              | 100.6 |
| 37 | April, 2021 | North Slope Borough School District 1                            | Snow  | 69.349025  | -148.0163  | Far North    | 781              | 82.8  |
| 38 | April, 2021 | Yukon Flats School District 2                                    | Snow  | 67.6690733 | -149.63816 | Interior     | 259 <sup>a</sup> | 69.7  |
| 39 | April, 2021 | North Slope Borough School District 2                            | Snow  | 68.0791167 | -149.77842 | Interior     | 259 <sup>a</sup> | 52.6  |
| 40 | April, 2021 | North Slope Borough School District 3                            | Snow  | 68.0859433 | -149.87353 | Interior     | 259 <sup>a</sup> | 72.5  |
| 41 | April, 2021 | Yukon Flats School District 3                                    | Snow  | 67.85767   | -149.67829 | Interior     | 756              | 80.1  |
| 42 | April, 2021 | Yukon Flats School District 4                                    | Snow  | 67.668775  | -149.64668 | Interior     | 719              | 95.9  |
| 43 | July, 2021  | Turnagain pass                                                   | Creek | 60.801799  | -149.18376 | Southcentral | 881              | 73.0  |
| 44 | July, 2021  | East fork Chulitna River                                         | River | 63.23264   | -149.20288 | Interior     | 86 <sup>b</sup>  | 58.2  |
| 45 | July, 2021  | Trail Lakes                                                      | Lake  | 60.500248  | -149.37407 | Southcentral | 86 <sup>b</sup>  | 571.9 |
| 46 | July, 2021  | Bird Creek                                                       | Creek | 60.973461  | -149.46657 | Southcentral | 259 <sup>a</sup> | 86.6  |

|    |              |                                            |       |            |            |              |                  |        |
|----|--------------|--------------------------------------------|-------|------------|------------|--------------|------------------|--------|
| 47 | July, 2021   | Bear Creek                                 | Creek | 64.13449   | -149.25352 | Interior     | 86 <sup>b</sup>  | 29.9   |
| 48 | July, 2021   | Sheep Creek                                | Creek | 61.994241  | -150.05883 | Southcentral | 748              | 85.1   |
| 49 | July, 2021   | Lower Troublesome Creek                    | Creek | 62.600828  | -150.23361 | Southcentral | 86 <sup>b</sup>  | 866.1  |
| 50 | July, 2021   | Nenana                                     | River | 63.517396  | -148.80512 | Interior     | 259 <sup>a</sup> | 1239.9 |
| 51 | July, 2021   | East fork six mile creek                   | Creek | 60.75547   | -149.38585 | Southcentral | 937              | 113.7  |
| 52 | April, 2021  | Top of the ridge next to radiation tower 1 | Snow  | 68.61584   | -149.3027  | Far North    | 1001             | 148.5  |
| 53 | April, 2021  | Top of the ridge next to radiation tower 2 | Snow  | 68.61584   | -149.3027  | Far North    | 595              | 125.6  |
| 54 | April, 2021  | Top of the ridge next to radiation tower 3 | Snow  | 68.61584   | -149.3027  | Far North    | 781              | 104.3  |
| 55 | April, 2021  | Top of the ridge next to radiation tower 4 | Snow  | 68.61584   | -149.3027  | Far North    | 259 <sup>a</sup> | 112.7  |
| 56 | April, 2021  | Top of the ridge next to radiation tower 5 | Snow  | 68.61584   | -149.3027  | Far North    | 581              | 105.1  |
| 57 | August, 2021 | Yukon River                                | River | 65.8785556 | -149.72119 | Interior     | 86 <sup>b</sup>  | 53.5   |
| 58 | August, 2021 | Yukon-Koyukuk School District 5            | River | 67.0178889 | -150.28753 | Interior     | 86 <sup>b</sup>  | 1034.7 |
| 59 | August, 2021 | Marion Creek                               | Creek | 67.3008889 | -150.14819 | Interior     | 86 <sup>b</sup>  | 1315.9 |
| 60 | August, 2021 | North Fork                                 | River | 66.6762222 | -150.64333 | Interior     | 86 <sup>b</sup>  | 1865.9 |
| 61 | August, 2021 | Carlo Creek                                | Creek | 63.566363  | -148.8135  | Interior     | 259 <sup>a</sup> | 1267.2 |
| 62 | August, 2021 | Savage River                               | River | 63.740558  | -149.29186 | Interior     | 711              | 32.3   |
| 63 | August, 2021 | Deep Creek North                           | Creek | 60.029995  | -151.68245 | Southcentral | 259 <sup>a</sup> | 56.4   |
| 64 | August, 2021 | Beluga Lake                                | Lake  | 59.6419    | -151.5146  | Southcentral | 259 <sup>a</sup> | 108.6  |
| 65 | August, 2021 | Kenai River                                | River | 60.4919    | -149.81038 | Southcentral | 259 <sup>a</sup> | NA     |
| 66 | August, 2021 | Anchor Point                               | Creek | 59.752436  | -151.76747 | Southcentral | 259 <sup>a</sup> | 117.7  |
| 67 | August, 2021 | Kasilof River                              | River | 60.3168592 | -151.25864 | Southcentral | 259 <sup>a</sup> | 113.4  |

|    |              |                 |       |            |            |              |                  |      |
|----|--------------|-----------------|-------|------------|------------|--------------|------------------|------|
| 68 | August, 2021 | Summit lake     | Lake  | 60.640898  | -149.49892 | Southcentral | 631              | 87.8 |
| 69 | August, 2021 | Centennial Park | River | 60.475886  | -151.08436 | Southcentral | 1331             | NA   |
| 70 | August, 2021 | Quartz Creek    | Creek | 60.478706  | -149.72417 | Southcentral | 695              | 86.2 |
| 71 | August, 2021 | Sisvalik Lake 1 | Lake  | 67.0744722 | -163.29353 | Interior     | 259 <sup>a</sup> | 88.6 |
| 72 | August, 2021 | Sisvalik Lake 2 | Lake  | 67.0744722 | -163.29353 | Interior     | 86 <sup>b</sup>  | 90.0 |
| 73 | August, 2021 | Paxon Lake      | Lake  | 62.8946    | -145.5318  | Southcentral | 259 <sup>a</sup> | 50.2 |

117

118 <sup>a</sup>Microplastics count below LOQ, <sup>b</sup>Microplastics count below LOD

119

120 **Table S2.** LOD and LOQ of MPs analysis method

121

| <b>Control</b>  | <b>MP Count (L<sup>-1</sup>)</b> | <b>Mean</b> | <b>SD</b> | <b>LOD</b> | <b>LOQ</b> |
|-----------------|----------------------------------|-------------|-----------|------------|------------|
| Deionized water | 444                              | 519.31      | 51.83     | 171.04     | 518.30     |
| Deionized water | 560                              |             |           |            |            |
| Deionized water | 580                              |             |           |            |            |
| Deionized water | 530                              |             |           |            |            |
| Deionized water | 510                              |             |           |            |            |
| Deionized water | 550                              |             |           |            |            |
| Deionized water | 440                              |             |           |            |            |
| Deionized water | 540                              |             |           |            |            |

122

123

124



125 **Table S3.** Analyzing the distribution of microplastics data for MPs count, size, and  
 126 morphology using various statistical methods. P values with bold font indicate a non-normal  
 127 distribution.

| <b>Statistical method</b> | <b>Data type</b>           | <b>Source</b> | <b>P Value</b>                          |                                        |
|---------------------------|----------------------------|---------------|-----------------------------------------|----------------------------------------|
| Shapiro-Wilk test         | MPs count<br>(Particles/L) | River         | <b><math>8 \times 10^{-4}</math></b>    |                                        |
|                           |                            | Lake          | <b><math>3 \times 10^{-2}</math></b>    |                                        |
|                           |                            | Creek         | <b><math>6 \times 10^{-3}</math></b>    |                                        |
|                           |                            | Snow          | <b><math>5 \times 10^{-3}</math></b>    |                                        |
| Kolmogorov-Smirnov test   | MPs size ( $\mu\text{m}$ ) | River         | <b><math>2.2 \times 10^{-16}</math></b> |                                        |
|                           |                            | Lake          | <b><math>2.2 \times 10^{-16}</math></b> |                                        |
|                           |                            | Creek         | <b><math>2.2 \times 10^{-16}</math></b> |                                        |
|                           |                            | Snow          | <b><math>2.2 \times 10^{-16}</math></b> |                                        |
| Shapiro-Wilk test         | MPs count<br>(Particles/L) | Southcentral  | <b><math>5 \times 10^{-4}</math></b>    |                                        |
|                           |                            | Interior      | <b><math>1 \times 10^{-3}</math></b>    |                                        |
|                           |                            | Far North     | 0.09                                    |                                        |
| Shapiro-Wilk test         | MPs percentage (%)         | Lake          | Fiber                                   | <b><math>1.9 \times 10^{-2}</math></b> |
|                           |                            |               | Fragment                                | <b><math>1.7 \times 10^{-3}</math></b> |
|                           |                            |               | Pellet                                  | <b><math>2.3 \times 10^{-3}</math></b> |
|                           |                            |               | Filament                                | <b><math>1.5 \times 10^{-3}</math></b> |
|                           |                            | River         | Fiber                                   | <b><math>4.6 \times 10^{-2}</math></b> |
|                           |                            |               | Fragment                                | <b><math>1.5 \times 10^{-2}</math></b> |
|                           |                            |               | Pellet                                  | <b><math>5.1 \times 10^{-4}</math></b> |
|                           |                            |               | Filament                                | <b><math>1.2 \times 10^{-2}</math></b> |
|                           |                            | Creek         | Fiber                                   | <b><math>8.4 \times 10^{-3}</math></b> |
|                           |                            |               | Fragment                                | <b><math>1.8 \times 10^{-2}</math></b> |
|                           |                            |               | Pellet                                  | <b><math>1.5 \times 10^{-3}</math></b> |
|                           |                            |               | Filament                                | <b><math>4.9 \times 10^{-3}</math></b> |
|                           |                            | Snow          | Fiber                                   | <b><math>3.1 \times 10^{-4}</math></b> |
|                           |                            |               | Fragment                                | <b><math>5.8 \times 10^{-3}</math></b> |
|                           |                            |               | Pellet                                  | <b><math>4.2 \times 10^{-4}</math></b> |
|                           |                            |               | Filament                                | <b><math>6.1 \times 10^{-2}</math></b> |

128

129

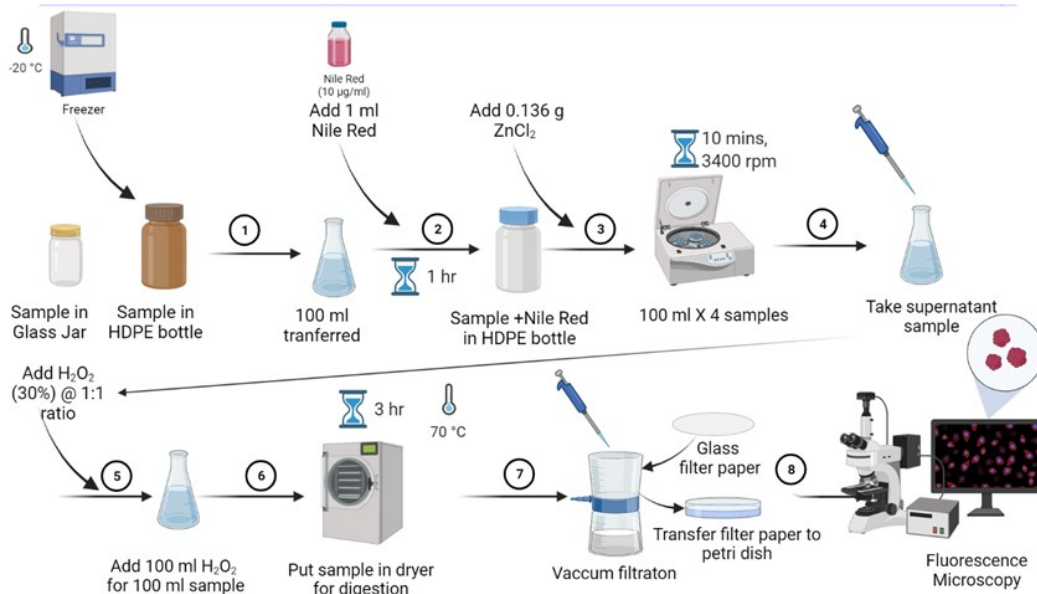

130  
131  
132  
133  
134  
135  
136

**Figure S1.** Methods developed for analyzing microplastics from collected samples

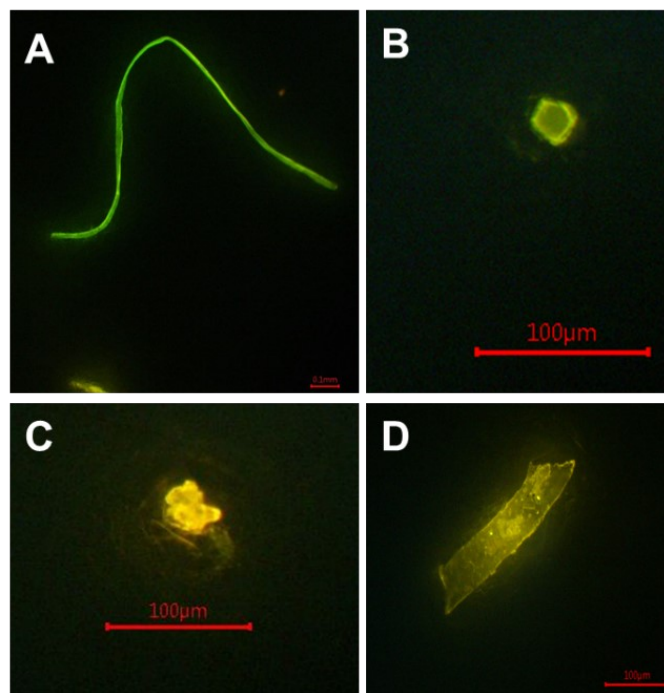

137  
138

**Figure S2.** Microplastics types based on morphology observed under fluorescent microscope at 400X magnification; fiber (A), fragments (B), pellet (C), film (D).

141

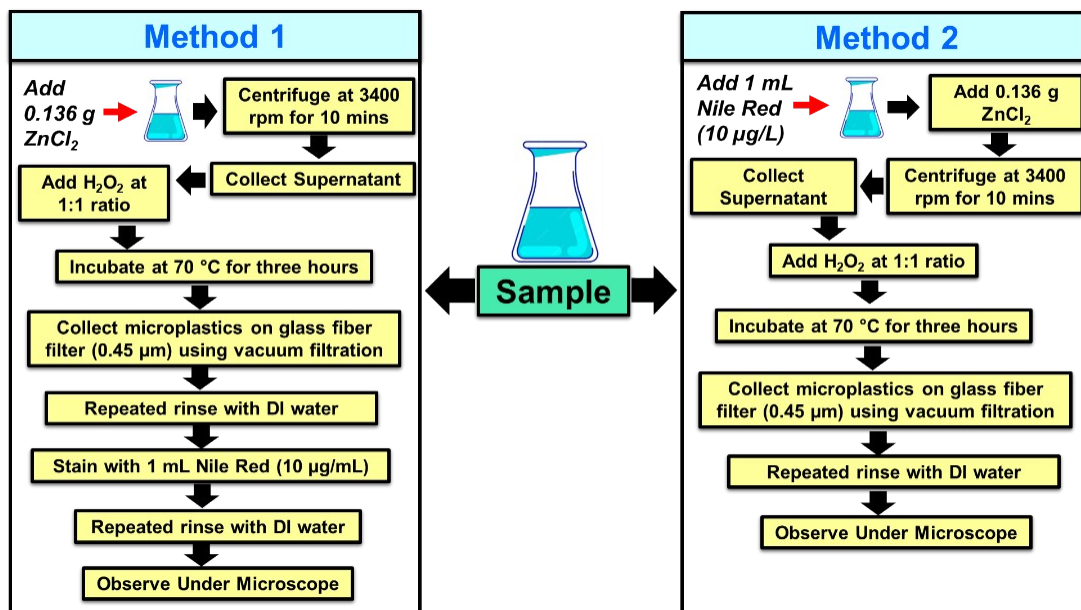

142  
 143 **Figure S3.** Schematic presentation of the two different methods compared in this study for  
 144 staining microplastics with Nile Red.  
 145  
 146

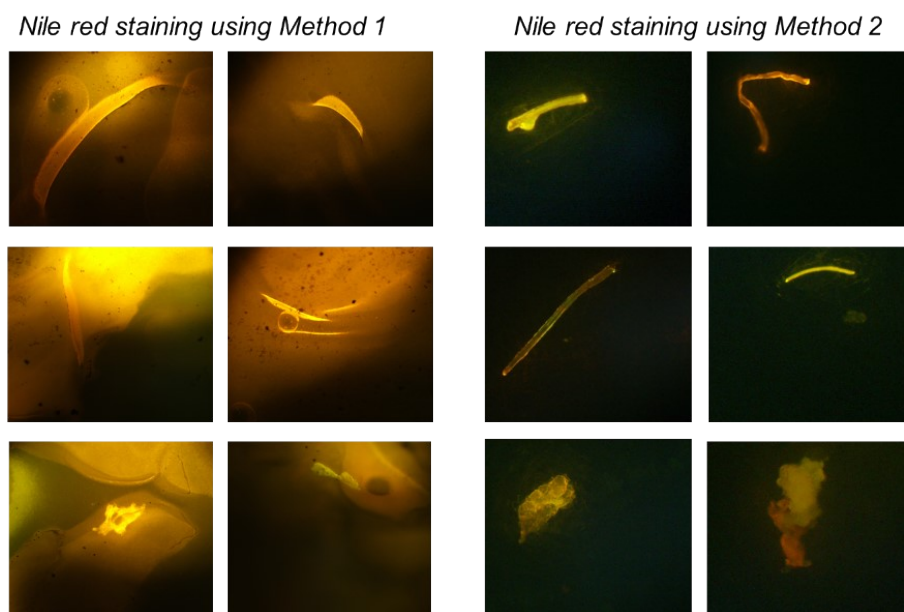

147  
 148 **Figure S4.** Nile Red stained microplastics observed under fluorescent microscope at 400X  
 149 magnification. The figure shows that method 2 enabled significant reduction of background  
 150 fluorescence noise and much better visibility of microplastics as compared to method 1.  
 151

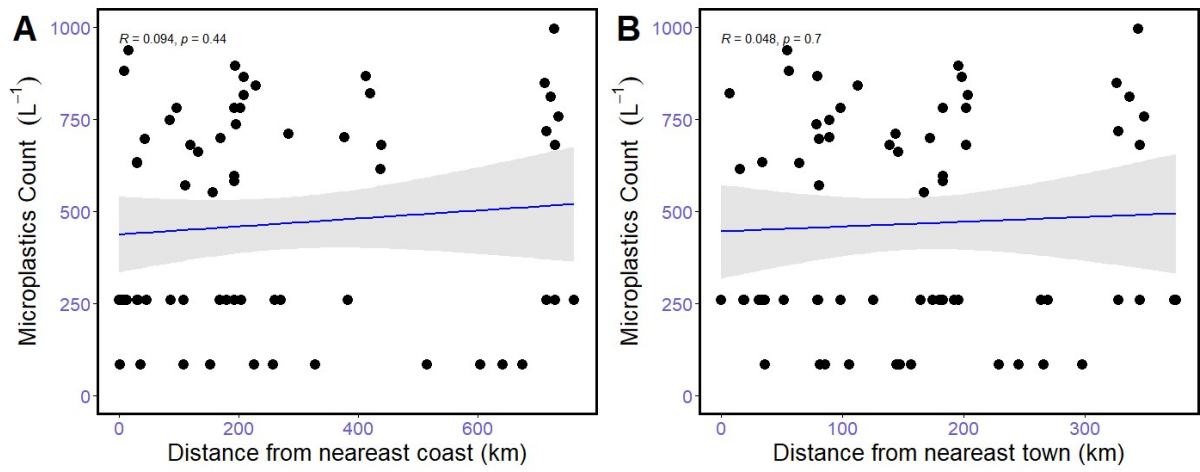

152  
 153  
 154  
 155  
 156

**Figure S5.** Correlations of overall MP counts from all sources in this study with respect to distance from nearest coast (A) and nearest town (B).
